# Supplementary material
Source: Springer Nature journal article supplement (https://www.springermedizin.de/resource/supplementary/12958_2009_676_MOESM1_ESM.pdf/9568562)

Placebo

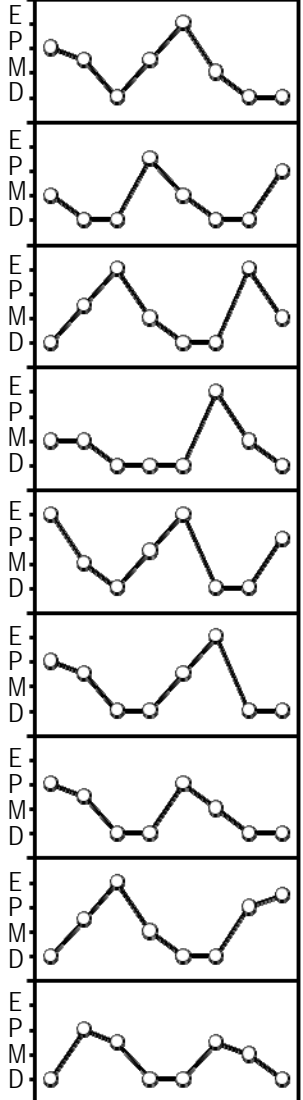

CPA

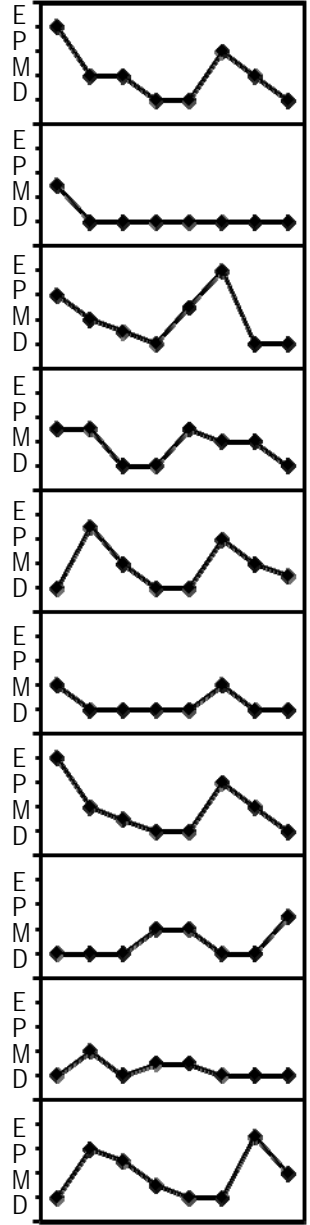

GnRHant + CPA

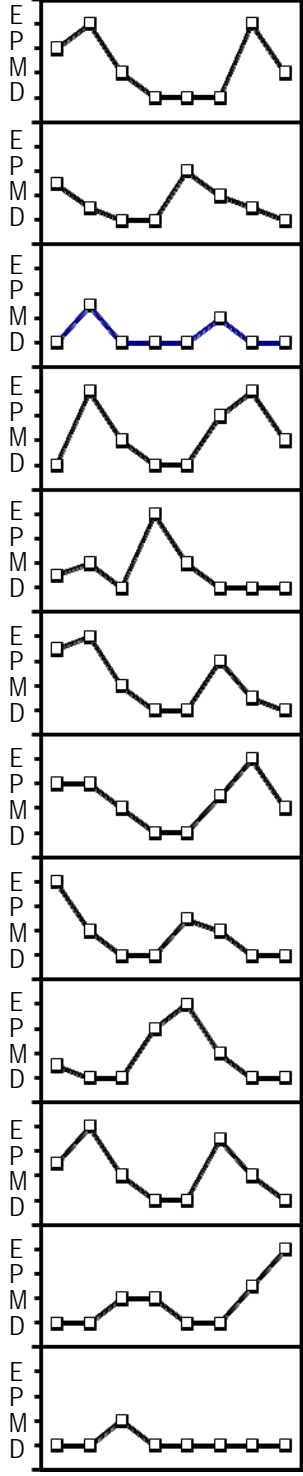

GnRHant

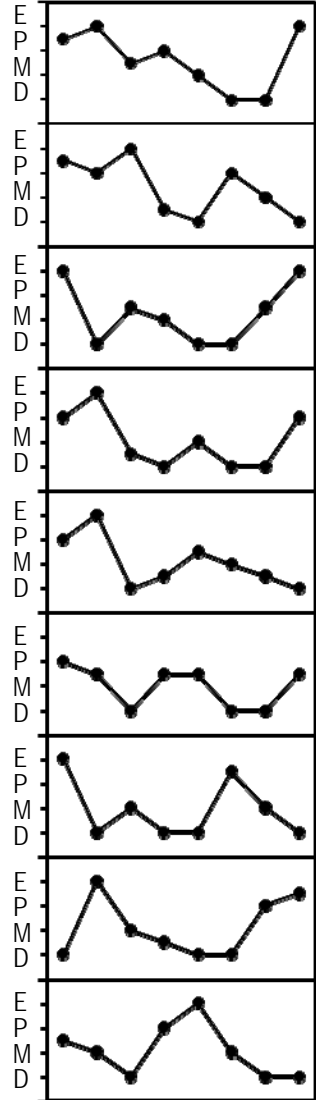

Supplement: MOESM1 [file 9568562]
